# Supplementary material for: Effects of leaf length and development stage on the triple oxygen isotope signature of grass leaf water and phytoliths: insights for a proxy of continental atmospheric humidity
Source: Copernicus journal article supplement (doi:10.5194/bg-16-4613-2019), 2019-12-05
Supplement: Supplementary file 1 [file bg-16-4613-2019-supplement.zip]

Archive with 2 entries (2 files):
- bg-16-4613-2019-supplement-title-page.pdf
- Supplementary material.xlsx
