# Supplementary material for: Effects of leaf length and development stage on the triple oxygen isotope signature of grass leaf water and phytoliths: insights for a proxy of continental atmospheric humidity
Source: Copernicus journal article supplement (doi:10.5194/bg-16-4613-2019), 2019-12-05
Supplement: Supplementary file 1 [file bg-16-4613-2019-supplement.zip › bg-16-4613-2019-supplement-title-page.pdf]

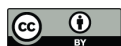

## *Supplement of*

# **Effects of leaf length and development stage on the triple oxygen isotope signature of grass leaf water and phytoliths: insights for a proxy of continental atmospheric humidity**

**Anne Alexandre et al.**

*Correspondence to:* Anne Alexandre ([alexandre@cerege.fr](mailto:alexandre@cerege.fr))

- [bg-16-4613-2019-supplement-title-page.pdf](#)
- [Supplementary material.xlsx](#)

The copyright of individual parts of the supplement might differ from the CC BY 4.0 License.
