# Supplementary material for: Effects of leaf length and development stage on the triple oxygen isotope signature of grass leaf water and phytoliths: insights for a proxy of continental atmospheric humidity
Source: Copernicus journal article supplement (doi:10.5194/bg-16-4613-2019), 2019-12-05
Supplement: Supplementary file 1 [file bg-16-4613-2019-supplement.zip › Supplementary material.xlsx]

## Sheet: Table 1
Table 1
	Growth conditions				Phytolith concentration				Phytoliths (Phyto)						Leaf water (LW)
Sample	Atm. temperature	Leaf temperature	RH	Total biomass	Phyto Concentration	Phyto proportion	n	d'18O	SD	d'17O	SD	17O-excess	SD	n	d'18O	d'17O	17O-excess
	°C	°C	%	g	% d.w.	%*		‰		‰		per meg			‰	‰	per meg
Young leaves: blade	20.4	18.4	72.85	57.2	0.752948		3	38.4738	0.167817	20.0716	0.205417	-242.506	7	1	13.6662	7.16975	-46
Adult leaves: sheath	20.4	18.4	72.85	55.57	0.797818	30.3698	3	34.7085	0.087575	18.1334	0.12006	-192.736	10	1	1.53882	0.827495	15
Adult leaves: proximal blade	20.4	18.4	72.85	35.5	0.715089	17.3895	3	35.5987	0.118246	18.5945	0.144569	-201.658	23	1	5.46504	2.88634	0.8
Adult leave: apical blade	20.4	18.4	72.85	35.9	2.1243	52.2407	2	40.7604	0.0179886	21.2466	0.0208359	-274.853	5	1	12.5805	6.60452	-38
Adult leaves: bulk blade av.	20.4	18.4	72.85	71.4	1.42364			39.4713	0.136234	20.5843	0.165405	-256.574	28		9.04272	4.75585	-18.7087
Semescent leaves: blade	20.4	18.4	72.85	12.54	2.96181		3	38.8913	0.187061	20.2993	0.228723	-235.306	6.71115
Irrigation water (IW)															-5.5858	-2.92341	25.8913
* % of bulk adult sheath and blade, ** % of the sum of counted phytoliths; ***Estimated after Dodd and Sharp, 2010; ****Estimated after eq. 12, Sharp et al., 2016
	27

## Sheet: Table S1 
Table S1. Growth chamber experiment 2a and 2b. Experimental set-up, phytolith content and triple oxygen isotope data obtained for phytoliths (Phyto), leaf water (LW) and irrigation water (IW). Samples are named according to the climate chamber # they were collected in (e.g. F4), the date of sampling (dd/mm/yy) and the sampling after day or night (Day vs Night in experiment 2a) or after constant c…
	Sample		Dur.	Temp.	RH	Light	Irrigation	Total biomass	Transpiration	Phyto Conc.	n	d18O	SD	d17O	SD	d'18O	SD	d'17O	SD	17O-excess	SD
			day	°C	%	mmol/m2/sec		g	L/day	% d.w.		‰		‰		‰		‰		per meg
	Experiment 2a										Leaf water (LW)
	F4-02-03-17 Day-sample1	Plant water	22	25	60	Sampled end 12h day					1	6.80036		3.52637		6.77734		3.52017		-58.2713
	F4-02-03-17 Day sample2	Plant water	22	25	60	Sampled end 12h day					1	6.65994		3.44514		6.63786		3.43922		-65.5691
	F4-02-03-17 Day-sample3	Plant water	22	25	60	Sampled end 12h day					1	6.22576		3.22717		6.20646		3.22197		-55.0336
	F4-02-03-17 Day-sample4	Plant water	22	25	60	Sampled end 12h day					1	5.79467		2.99815		5.77795		2.99366		-57.0957
	Average / SD											6.56202	0.455004	3.29921	0.237154	6.3499	0.452156	3.29376	0.236384	-58.9924	4.58414
	F4-06-03-17 Night sample5	Plant water	26	25	60	Sampled end 12h night					1	7.42927		3.84999		7.40181		3.84259		-65.563
	F4-06-03-17 Night sample6	Plant water	26	25	60	Sampled end 12h night					1	6.83734		3.54179		6.81407		3.53553		-62.296
	F4-06-03-17 Night sample7	Plant water	26	25	60	Sampled end 12h night					1	6.2617		3.25056		6.24218		3.24529		-50.5795
	F4-06-03-17 Night sample8	Plant water	26	25	60	Sampled end 12h night					1	8.62891		4.46226		8.59189		4.45233		-84.185
	Average /SD											7.28931	1.01232	3.77615	0.51877	7.26249	1.0048	3.76894	0.516766	-65.6559	13.9275
	Experiment 2b										Phytolith (Phyto)
	R2-16-12-2016-Cst	Phytolith	16	25	60	290	yes	75		2.2	1	33.7973		17.4616		33.2388		17.3109		-239.137
	R1-16-12-2016-DN	Phytolith	16	25/15	60/80	290/0 alternation	yes	83		2.2	1	32.565		16.8213		32.046		16.6814		-238.904
	R2-03-01-2016-Cst	Phytolith	18	25	60	290	yes	49	0.5	2.9	2	33.1312	0.0167741	17.0779	0.0133172	32.5942	0.016774	16.9337	0.0133171	-276.04	21.6663
	R1-03-01-2016-DN	Phytolith	18	25/15	60/80	290/0 alternation	yes	48	0.4	3.1	2	34.4969	0.0289914	17.7595	0.0188562	33.9152	0.028991	17.6036	0.018856	-303.627	3.73037
											Irrigation water (IW)
	M2-16-12-16-Cst	irrigation water	16	25	60	290					3	-5.63	0.0112	-2.95	0.0228	-5.64591		-2.95436		26.6797
	M1-16-12-16 DN	irrigation water	16	25/15	60/80	290/0 alternation					3	-5.61	0.022	-2.94	0.016	-5.6258		-2.94433		26.0896

## Sheet: Table S2
Table S2. Growth chamber experiment 1 : Experimental set-up, phytolith content, phytolith morphological assemblages and triple oxygen isotope raw data obtained for phytoliths (Phyto), leaf water (LW), irrigation (IW) and phytolith-forming water (FW). n : number of replicates ; SD : standard deviation calculated on the replicates; Phyto Conc. (% d.w.) stands for phytolith concentration expressed i…
				Growth conditions							Phytolith concentration				Phytolith types					Phytoliths (Phyto)														Leaf water (LW) and irrigation water (IW)
Sample		Growth period	Duration	Atm. temperature	SD	Leaf temperature	Relative humidity (RH)	SD	Irrigation	Total biomass	Phyto Concentration	Phyto proportion	Short cell (<60mm)	Long cell (>60mm)	Acicular hair	Bulliform cell	Silica sheets	Total	Long cells /(Long+Short cells)	n	d18O	SD	d17O	SD	d'18O	SD	d'17O	SD	17O-excess	SD	l	n	d18O	d17O	d'18O	d'17O	17O-excess	l
			day	°C			%			g	% d.w.	%*	% total						%		‰		‰		‰		‰		per meg				‰	‰	‰	‰	per meg
Experiment 1			39	20.4	0.14	18.4	72.9	0.92	No
P4-75-02-09-2016-Y	Young leaves: blade	7/25 to 9/2/2016	39	20.4	0.14	18.4	72.9	0.92	No	57.2	0.752948		52.4845	21.8225	0.414352	0.828703	24.4499	724.023	29.368	3	39.2235	0.167831	20.2744	0.205438	38.4738	0.167817	20.0716	0.205417	-242.506	7	0.521697	1	13.76	7.19551	13.6662	7.16975	-46	0.524634
P4-75-02-09-2016-Sh	Adult leaves: sheath		39	20.4	0.14	18.4	72.9	0.92	No	55.57	0.797818	50.7243	66.5616	0.466554	0	0	32.9718	643.013	0.696056	3	35.3179	0.0875788	18.2988	0.120067	34.7085	0.087575	18.1334	0.12006	-192.736	10	0.522447	1	1.54	0.827837	1.53882	0.827495	15	0.537748
P4-75-02-09-2016-A<10	Adult leaves: proximal blade		39	20.4	0.14	18.4	72.9	0.92	No	35.5	0.715089	29.0443	61.3835	14.223	0	0.187145	24.2063	534.346	18.8119	3	36.24	0.118253	18.7684	0.14458	35.5987	0.118246	18.5945	0.144569	-201.658	23	0.522335	1	5.48	2.89051	5.46504	2.88634	0.8	0.528146
P4-75-02-09-2016-A>10	Adult leave: apical blade		39	20.4	0.14	18.4	72.9	0.92	No	35.9	2.1243	87.2533	33.5065	48.0519	2.33766	0.519481	15.5844	385	58.9172	2	41.6025	0.0179887	21.4739	0.0208361	40.7604	0.0179886	21.2466	0.0208359	-274.853	5	0.521257	1	12.66	6.62638	12.5805	6.60452	-38	0.524979
	Adult leaves: bulk blade av.		39	20.4	0.14	18.4	72.9	0.92	No	71.4	1.42364		40.4685	39.6035	1.75385	0.436483	17.7377	919.346	48.9013		40.2632		20.7983		39.4713		20.5843		-256.574		0.521526		9.09011	4.76891	9.04272	4.75585	-18.7087	0.525931
	Adult leaves: bulk leaf av.		39	20.4	0.14	18.4	72.9	0.92	No	126.97	1.14974	167.022	80.8268	46.2945	2.03969	0.507619	37.3532	1562.36	36.4176		38.7613		20.0392		38.029		19.841		-238.276		0.521734		5.78571	3.04405	5.76904	3.03943	-6.62618	0.526851
P4-75-02-09-2016-S	Semescent leaves: blade		39	20.4	0.14	18.4	72.9	0.92	No	12.54	2.96181		14.8936	30.0236	1.65485	0.945626	52.4823	423	66.8421	3	39.6575	0.187078	20.5068	0.228749	38.8913	0.187061	20.2993	0.228723	-235.306	6.71115	0.52195
Irrigation water (IW)																																	-5.57	-2.92	-5.58557	-2.92329	25.8913
* % of bulk adult leaf (sheath and blade); **estimated after Dodd and Sharp, 2010; *** 17e=(EXP(q*LN(18e/1000+1))-1)*1000

## Sheet: Table S3
Table S3. a) d 18O, d 17O and 17O-excess predicted for bulk leaf water (LW) and phytolith (Phyto) according to the Craig and Gordon (C&G) model adapted to leaf water by Farquhar et al. (2007). After spreadsheet, symbols and abbreviations provided in Cernusak et al. (2016). For the water-vapor couple, the equilibrium and kinetic fractionation 17aeq and 17aK are calculated using 17aeq=18aeq0.529 an…
a) GC model, Farquhar et al. 2007 in Cernusak et al., 2016 (eq.4)
	Sampling details			Physiological data		Isotopic data						Calculations
																					Predicted						Observed						Predicted					Observed					Predicted Phyto
Sample	Air tem.	Leaf temp.	Air RH	Stomatal cond.	Boundary layer cond.	Atm. Vapor (V) d18O	Atm. Vapor (V) d17O	Irrigation water (IW) d18O	Irrigation water (IW) d17O	Leaf water (LW) d18O	Leaf water (LW) d17O	air vapor pressure- ea	leaf vapor pressure- ei	Water vapour mole fraction ratio wa/wi	ak for d18O	ak for d17O	aequil for d18O at leaf temp	aequil for d17O at leaf temp	Dv for d18O	Dv for d17O	D18OLW-IW	D17OLW-IW	D'18OLW-IW	D'17OLW-IW	17O-excess LW-IW	lLW-IW	D18OLW-IW	D17OLW-IW	D'18OLW-IW	D'17OLW-IW	17O-excess LW-IW	lLW-IW	d18OLW	d17OLW	d'18OLW	d'17OLW	17O-excess LW	d18OLW	d17OLW	d'18OLW	d'17OLW	17O-excess LW	a18OPhyto-LW*	a17OPhyto-LW**	d18OPhyto	d17OPhyto	d'18OPhyto	d'17OPhyto	17O-excess Phyto
	°C	°C	%	mol m-2 s-1	mol m-2 s-1	‰	‰	‰	‰	‰	‰	kPa	kPa		‰	‰	‰	‰	‰	‰	‰		‰	‰	per meg		‰	‰	‰	‰	per meg		‰	‰	‰	‰	per meg	‰	‰	‰	‰	per meg			‰	‰	‰	‰	per meg
																																												lsilica-water=0.522
P4-75-02-09-2016- Adult bulk leaf	20.4	18.4	73	0.4	20	-5.57	-2.92	-5.57	-2.92	5.78571	3.04405	1.75592	2.12396	0.826722	1.02782	1.01432	1.00995	1.00525	0	0	14.8154	7.74318	14.7067	7.71336	-51.7902	0.524478	11.4193	5.98152	11.3546	5.9637	-31.5358	0.525223	9.16287	4.80057	9.12115	4.78909	-26.8806	5.78571	3.04405	5.76904	3.03943	-6.62618	1.03288	1.01703	42.3402	21.9109	41.4683	21.6743	-220.964
																																												lsilica-water=0.521
P4-75-02-09-2016- Adult bulk leaf	20.4	18.4	73	0.4	20	-5.57	-2.92	-5.57	-2.92	5.78571	3.04405	1.75592	2.12396	0.826722	1.02782	1.01432	1.00995	1.00525	0	0	14.8154	7.74318	14.7067	7.71336	-51.7902	0.524478	11.4193	5.98152	11.3546	5.9637	-31.5358	0.525223	9.16287	4.80057	9.12115	4.78909	-26.8806	5.78571	3.04405	5.76904	3.03943	-6.62618	1.03288	1.017	42.3402	21.8779	41.4683	21.642	-253.311
*Ratio of water vapour mole fraction in the atmosphere (a) and in the intercellular spaces indie leaves (i)
[truncated: 18 more columns]

## Sheet: Table S4
Table S4. d18O, d 17O and 17O-excess predicted for a) leaf water (LW) along the leaf length according to the Farquhar and Gan (2003) equations 2, 3 and 5 and assuming a radial Péclet number of zero. See Farquhar and Gan (2003) for definition of the parameters. For the water-vapor couple, the equilibrium and kinetic fractionation 17aeq and 17aK are calculated using 17aeq=18aeq0.529 and 17ak=18ak0.…
a)	Predicted isotope composition of leaf water (LW) according to Farquhar and Gan, 2003																													Mixing between non evaporated and evaporated water
																eq.3				eq.2		eq. 5
	wa/wi	Atm. Vapor (V) d18O	Atm. vapor (V) d17O	Irrigation water (IW) d18O	Irrigation water (IW) d17O	Maximal length (lm)	total length (l)	ak for d18O*	ak for d17O*	a+ for d18O at leaf temp	a+ for d17O at leaf temp	18DV (or 18DV-IW)	17DV (or 17DV-IW)	18DC*	17DC*	18h' (equivalent to relative humidity with respect to leaf temperature)	18h'/(1-18h')	17h' (equivalent to relative humidity with respect to leaf temperature)	17h'/(1-17h')	Maximum enrichment 18DM	Maximum enrichment 17DM	D18OLW-SW	D17OLW-SW	d18OLW	d17OLW	d'18OLW	d'17OLW	17O-excessLW		E**	d18OLW	d17OLW	d'18OLW	d'17OLW	17O-excessLW
								‰	‰	‰	‰	‰	‰	‰	‰					‰	‰	‰	‰	‰	‰	‰	‰	per meg			‰	‰	‰	‰	per meg
	0.826722	-5.57	-2.92	-5.57	-2.92	24	0	1.02782	1.01432	1.00995	1.00525	0	0	14.8154	7.74318	0.82013	4.55956	0.823319	4.65991	18.0647	9.40484	0	0	-5.57	-2.92	-5.58557	-2.92427	24.9096		0	-5.57	-2.92	-5.58557	-2.92427	24.9096
	0.826722	-5.57	-2.92	-5.57	-2.92	24	2	1.02782	1.01432	1.00995	1.00525	0	0	14.8154	7.74318	0.82013	4.55956	0.823319	4.65991	18.0647	9.40484	5.91595	3.13495	0.313	0.205794	0.312951	0.205773	40.5353		0.2	-4.3934	-2.29484	-4.40308	-2.29748	27.3476
	0.826722	-5.57	-2.92	-5.57	-2.92	24	4	1.02782	1.01432	1.00995	1.00525	0	0	14.8154	7.74318	0.82013	4.55956	0.823319	4.65991	18.0647	9.40484	10.1979	5.38347	4.57108	2.44775	4.56066	2.44476	36.7317		0.4	-1.51357	-0.772899	-1.51471	-0.773198	26.5718
	0.826722	-5.57	-2.92	-5.57	-2.92	24	6	1.02782	1.01432	1.00995	1.00525	0	0	14.8154	7.74318	0.82013	4.55956	0.823319	4.65991	18.0647	9.40484	13.1988	6.94363	7.55526	4.00336	7.52686	3.99537	21.1837		0.6	2.30516	1.23402	2.3025	1.23325	17.5329
	0.826722	-5.57	-2.92	-5.57	-2.92	24	8	1.02782	1.01432	1.00995	1.00525	0	0	14.8154	7.74318	0.82013	4.55956	0.823319	4.65991	18.0647	9.40484	15.2207	7.98323	9.5659	5.03992	9.52044	5.02726	0.465379		0.64	4.11698	2.17435	4.10853	2.17199	2.68339
	0.826722	-5.57	-2.92	-5.57	-2.92	24	10	1.02782	1.01432	1.00995	1.00525	0	0	14.8154	7.74318	0.82013	4.55956	0.823319	4.65991	18.0647	9.40484	16.5176	8.64181	10.8556	5.69657	10.7971	5.68041	-20.467		0.68	5.59941	2.93927	5.5838	2.93496	-13.287
	0.826722	-5.57	-2.92	-5.57	-2.92	24	12	1.02782	1.01432	1.00995	1.00525	0	0	14.8154	7.74318	0.82013	4.55956	0.823319	4.65991	18.0647	9.40484	17.2986	9.03281	11.6323	6.08643	11.5651	6.06799	-38.4091		0.72	6.81564	3.56463	6.79252	3.55829	-28.1556
	0.826722	-5.57	-2.92	-5.57	-2.92	24	14	1.02782	1.01432	1.00995	1.00525	0	0	14.8154	7.74318	0.82013	4.55956	0.823319	4.65991	18.0647	9.40484	17.7311	9.24577	12.0623	6.29877	11.9902	6.27901	-51.7902		0.76	7.83057	4.08626	7.80007	4.07794	-40.4995
	0.826722	-5.57	-2.92	-5.57	-2.92	24	16	1.02782	1.01432	1.00995	1.00525	0	0	14.8154	7.74318	0.82013	4.55956	0.823319	4.65991	18.0647	9.40484	17.9441	9.34861	12.2741	6.40131	12.1994	6.38091	-60.3918		0.8	8.70532	4.53705	8.66764	4.52678	-49.7308
	0.826722	-5.57	-2.92	-5.57	-2.92	24	18	1.02782	1.01432	1.00995	1.00525	0	0	14.8154	7.74318	0.82013	4.55956	0.823319	4.65991	18.0647	9.40484	18.0322	9.39012	12.3618	6.4427	12.286	6.42204	-64.9633		0.84	9.49269	4.94467	9.44792	4.93249	-56.0126
	0.826722	-5.57	-2.92	-5.57	-2.92	24	20	1.02782	1.01432	1.00995	1.00525	0	0	14.8154	7.74318	0.82013	4.55956	0.823319	4.65991	18.0647	9.40484	18.0596	9.40262	12.389	6.45516	12.3129	6.43441	-66.7837		0.88	10.2339	5.33014	10.1819	5.31599	-60.0576
	0.826722	-5.57	-2.92	-5.57	-2.92	24	22	1.02782	1.01432	1.00995	1.00525	0	0	14.8154	7.74318	0.82013	4.55956	0.823319	4.65991	18.0647	9.40484	18.0645	9.40475	12.3939	6.45729	12.3177	6.43653	-67.2072		0.92	10.9568	5.70711	10.8972	5.69088	-62.8185
	0.826722	-5.57	-2.92	-5.57	-2.92	24	24	1.02782	1.01432	1.00995	1.00525	0	0	14.8154	7.74318	0.82013	4.55956	0.823319	4.65991	18.0647	9.40484	18.0647	9.40484	12.3941	6.45738	12.3179	6.43662	-67.2325		1	12.3941	6.45738	12.3179	6.43662	-67.2325
	*Equivalent to predicted D18OLW-IW and D17OLW-IW in Table S3.																													**Proportion of evaporated water relatively to evaporated and irrigation (non-evaporated) waters
b)	Predicted isotope composition of phytolith (Phyto) according to Dodd and Sharp (2010) and using lPhyto-LW=0.522
	Leaf temperature	lm	l	18aPhyto-LW	17aPhyto-LW	d180Phyto***	d170Phyto	d'18OPhyto	d'17OPhyto	17O-excessPhyto
	°C	cm	cm			‰	‰	‰	‰	per meg
	18.4	24	0	1.03288	1.01703	27.1229	14.0589	26.7616	13.961	-169.174
	18.4	24	2	1.03288	1.01703	33.1993	17.2379	32.6601	17.091	-153.548
	18.4	24	4	1.03288	1.01703	37.5974	19.518	36.9078	19.33	-157.351
	18.4	24	6	1.03288	1.01703	40.6797	21.1001	39.874	20.8806	-172.899
	18.4	24	8	1.03288	1.01703	42.7564	22.1543	41.8676	21.9125	-193.618
	18.4	24	10	1.03288	1.01703	44.0885	22.8222	43.1443	22.5656	-214.55
	18.4	24	12	1.03288	1.01703	44.8907	23.2187	43.9123	22.9532	-232.492
	18.4	24	14	1.03288	1.01703	45.3349	23.4346	44.3373	23.1642	-245.873
	18.4	24	16	1.03288	1.01703	45.5537	23.5389	44.5466	23.2661	-254.475
	18.4	24	18	1.03288	1.01703	45.6442	23.581	44.6332	23.3073	-259.046
	18.4	24	20	1.03288	1.01703	45.6723	23.5937	44.6601	23.3196	-260.867
	18.4	24	22	1.03288	1.01703	45.6774	23.5958	44.6649	23.3218	-261.29
	18.4	24	24	1.03288	1.01703	45.6776	23.5959	44.6651	23.3218	-261.316
	*** cf Table S2
	Predicted isotope composition of phytolith (Phyto) according to Dodd and Sharp (2010) and using lPhyto-LW=0.524
	Leaf temperature	lm	l	18aPhyto-LW	17aPhyto-LW	d180Phyto***	d170Phyto	d'18OPhyto	d'17OPhyto	17O-excessPhyto
	°C	cm	cm			‰	‰	‰	‰	per meg
	18.4	24	0	1.03288	1.01709	27.1229	14.1245	26.7616	14.0257	-104.479
	18.4	24	2	1.03288	1.01709	33.1993	17.3037	32.6601	17.1557	-88.8534
	18.4	24	4	1.03288	1.01709	37.5974	19.584	36.9078	19.3947	-92.6571
	18.4	24	6	1.03288	1.01709	40.6797	21.1662	39.874	20.9453	-108.205
	18.4	24	8	1.03288	1.01709	42.7564	22.2205	41.8676	21.9772	-128.923
	18.4	24	10	1.03288	1.01709	44.0885	22.8883	43.1443	22.6303	-149.856
	18.4	24	12	1.03288	1.01709	44.8907	23.2849	43.9123	23.0179	-167.798
	18.4	24	14	1.03288	1.01709	45.3349	23.5008	44.3373	23.2289	-181.179
	18.4	24	16	1.03288	1.01709	45.5537	23.6051	44.5466	23.3308	-189.781
	18.4	24	18	1.03288	1.01709	45.6442	23.6472	44.6332	23.372	-194.352
	18.4	24	20	1.03288	1.01709	45.6723	23.6599	44.6601	23.3843	-196.172
	18.4	24	22	1.03288	1.01709	45.6774	23.6621	44.6649	23.3865	-196.596
	18.4	24	24	1.03288	1.01709	45.6776	23.6622	44.6651	23.3865	-196.621
	*** cf Table S2
	Predicted isotope composition of phytolith (Phyto) according to Dodd and Sharp (2010) and using lPhyto-LW decreasing from 0.522 to 0.520 from the base to the apex of the leaf
													Mixing between non evaporated and evaporated water
	Leaf temperature	lm	l	18aPhyto-LW	lsilica-water	17aPhyto-LW	d180Phyto***	d170Phyto	d'18OPhyto	d'17OPhyto	17O-excessPhyto		E**	d18OPhyto	d17OPhyto	d'18OPhyto	d'17OPhyto	17O-excessPhyto
	°C	cm	cm	‰	‰	‰	‰	‰	‰	‰	per meg			‰	‰	‰	‰	per meg
	18.4	24	0	1.03288	0.522	1.01703	27.1229	14.0589	26.7616	13.961	-169.174		0	27.1229	14.0589	26.7616	13.961	-169.174
	18.4	24	2	1.03288	0.52185	1.01702	33.1993	17.233	32.6601	17.0862	-158.4		0.2	28.3382	14.6897	27.9441	14.5829	-171.588
	18.4	24	4	1.03288	0.5217	1.01702	37.5974	19.5081	36.9078	19.3203	-167.056		0.4	31.3127	16.2327	30.8325	16.1023	-177.215
	18.4	24	6	1.03288	0.52155	1.01701	40.6797	21.0853	39.874	20.866	-187.456		0.6	35.257	18.2688	34.6497	18.1039	-191.106
	18.4	24	8	1.03288	0.5214	1.01701	42.7564	22.1345	41.8676	21.8931	-213.026		0.64	37.1284	19.2202	36.4557	19.0378	-210.808
	18.4	24	10	1.03288	0.52125	1.017	44.0885	22.7974	43.1443	22.5414	-238.811		0.68	38.6595	19.9932	37.931	19.7959	-231.63
	18.4	24	12	1.03288	0.5211	1.017	44.8907	23.1889	43.9123	22.9241	-261.605		0.72	39.9158	20.6242	39.1397	20.4144	-251.351
	18.4	24	14	1.03288	0.52095	1.01699	45.3349	23.3999	44.3373	23.1303	-279.838		0.76	40.964	21.1498	40.1473	20.9292	-268.547
	18.4	24	16	1.03288	0.5208	1.01699	45.5537	23.4992	44.5466	23.2273	-293.292		0.8	41.8676	21.6032	41.0148	21.3732	-282.63
	18.4	24	18	1.03288	0.52065	1.01698	45.6442	23.5363	44.6332	23.2636	-302.715		0.84	42.6808	22.0128	41.7951	21.774	-293.764
	18.4	24	20	1.03288	0.5205	1.01698	45.6723	23.544	44.6601	23.2711	-309.388		0.88	43.4464	22.3999	42.5291	22.1527	-302.661
	18.4	24	22	1.03288	0.52035	1.01697	45.6774	23.5412	44.6649	23.2684	-314.663		0.92	44.193	22.7783	43.2443	22.5227	-310.274
	18.4	24	24	1.03288	0.5202	1.01697	45.6776	23.5363	44.6651	23.2636	-319.541		1	45.6776	23.5363	44.6651	23.2636	-319.541
	*** cf Table S2												**Proportion of evaporated water relatively to evaporated and irrigation (non-evaporated) waters
